# Supplementary material
Source: PubMed Central journal article supplement (PMC5086094)
Supplement: NIHMS69790-supplement-Supplementary_Table_1.pdf [file NIHMS69790-supplement-Supplementary_Table_1.pdf]

| Modality | Duration | Voxel, Matrix                  | Key Parameters                                                                  |
|----------|----------|--------------------------------|---------------------------------------------------------------------------------|
| T1       | 4:54     | 1.0x1.0x1.0 mm<br>208x256x256  | 3D MPRAGE, sagittal, R=2, TI/TR=880/2000 ms                                     |
| T2 FLAIR | 5:52     | 1.05x1.0x1.0 mm<br>192x256x256 | FLAIR, 3D SPACE, sagittal, R=2, PF 7/8, fat sat, TI/TR=1800/5000 ms, elliptical |
| swMRI    | 2:34     | 0.8x0.8x3.0 mm<br>256x288x48   | 3D GRE, axial, R=2, PF 7/8 TE1/TE2/TR=9.4/20/27 ms,                             |
| dMRI     | 7:08     | 2.0x2.0x2.0 mm<br>104x104x72   | MB=3, R=1, fat sat, b=0(5x + 3x phase-encoding-reversed), 1000(50x), 2000(50x)  |
| rfMRI    | 6:10     | 2.4x2.4x2.4 mm<br>88x88x64     | TE/TR=39/735 ms, MB=8, R=1, flip angle 52°, fat sat                             |
| tfMRI    | 4:13     | 2.4x2.4x2.4 mm<br>88x88x64     | Acquisition same as rfMRI. Task is faces/shapes "emotion" task.                 |

R = in-plane acceleration factor, MB = multiband factor, PF=partial Fourier. All non-EPI scans are pre-scan normalized (on-scanner bias-field corrected). Gradient distortion correction is turned off on the scanner and applied in post-processing.

**Supplementary Table 1.** Overview of the UK Biobank brain MRI protocol (31 minutes total scan time).
